# Supplementary material for: Single cytidine units-templated syntheses of multi-colored water-soluble Au nanoclusters
Source: Royal Society of Chemistry journal article supplement (doi:10.1039/c4nr02180k), 2014-01-01
Supplement: c4nr02180k1.pdf [file c4nr02180k1.pdf]

## Electronic Supplementary Information

### Single cytidine units-templated syntheses of multicolored water-soluble Au nanoclusters

Hui Jiang, Yuanyuan Zhang, and Xuemei Wang\*

*State Key Laboratory of Bioelectronics, Southeast University, Nanjing 210096, P. R. China*

\* Corresponding author: Tel.: +86-25-83792177; E-mail: xuewang@seu.edu.cn

**Table S1 Feed amount for preparation of multicolored Au NCs**

|                      | H <sub>2</sub> AuCl <sub>4</sub><br>(20 mM) | CMP or Cyt<br>(20 mM) | H <sub>2</sub> O | Citrate (500 mM) |
|----------------------|---------------------------------------------|-----------------------|------------------|------------------|
| b-Au-CMP<br>b-Au-Cyt | 0.1 mL                                      | 0.2 mL                | 1.5 mL           | 0.2 mL, pH 5     |
| g-Au-Cyt             | 0.1 mL                                      | 0.1 mL                | 1.6 mL           | 0.2 mL, pH 7     |
| y-Au-CMP             | 0.1 mL                                      | 0.2 mL                | 1.5 mL           | 0.2 mL, pH 4     |

**Table S2 Photophysical properties of Au NCs**

|         | UV peak<br>(nm) | Excitation<br>peaks (nm) | Emission<br>peak (nm) | Quantum Yield<br>(%)* | Lifetime (ratio) (ns)                    |
|---------|-----------------|--------------------------|-----------------------|-----------------------|------------------------------------------|
| b-AuCMP | 280, 330        | 360                      | 470                   | 3.3                   | 6.28(0.62), 15.55 (0.23),<br>0.82 (0.15) |
| g-AuCyt | 283, 380        | 350, 440                 | 505                   | 0.6                   | 5.53 (0.52), 0.22 (0.48)                 |
| y-AuCMP | 280             | 380, 520                 | 550                   | 0.4                   | 4.15 (0.14), 0.02 (0.86)                 |

\* take quinine sulfate in 0.1 N sulfuric acid as a standard (55%).

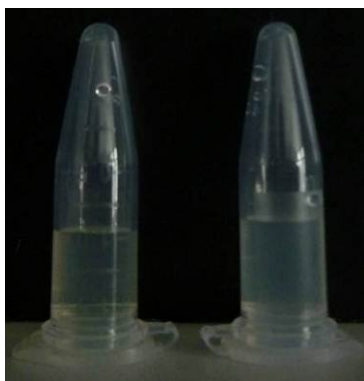

**Fig. S1.** Photos taken at 1 min after addition of  $\text{AgNO}_3$  (final concentration: 1 mM) to mixture containing only 1 mM  $\text{AuCl}_4^-$  (left) or 1 mM  $\text{AuCl}_4^-$  and 2 mM cytidine (right). The right sample was cloudy while the left one kept clear.

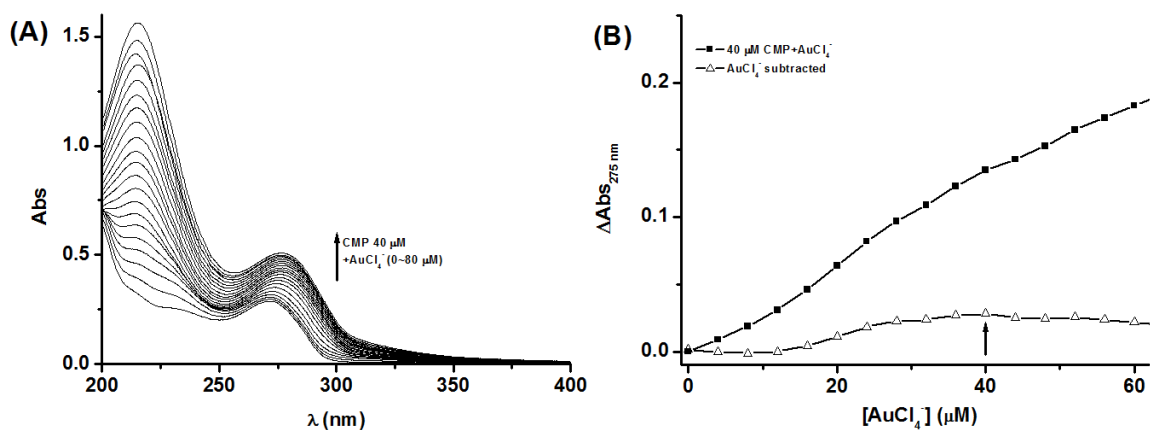

**Fig. S2.** (A) Titration of  $\text{AuCl}_4^-$  to 40  $\mu\text{M}$  CMP monitored by UV spectra. (B) The relationship of apparent increment (solid cube) and subtracted increment (hollow triangle) in peak absorbance at 275 nm and concentration of  $\text{AuCl}_4^-$ . The maximum  $\Delta\text{Abs}_{275\text{ nm}}$  appears at addition of 40  $\mu\text{M}$   $\text{AuCl}_4^-$ , indicating a “saturated” complexation ratio of 1:1.

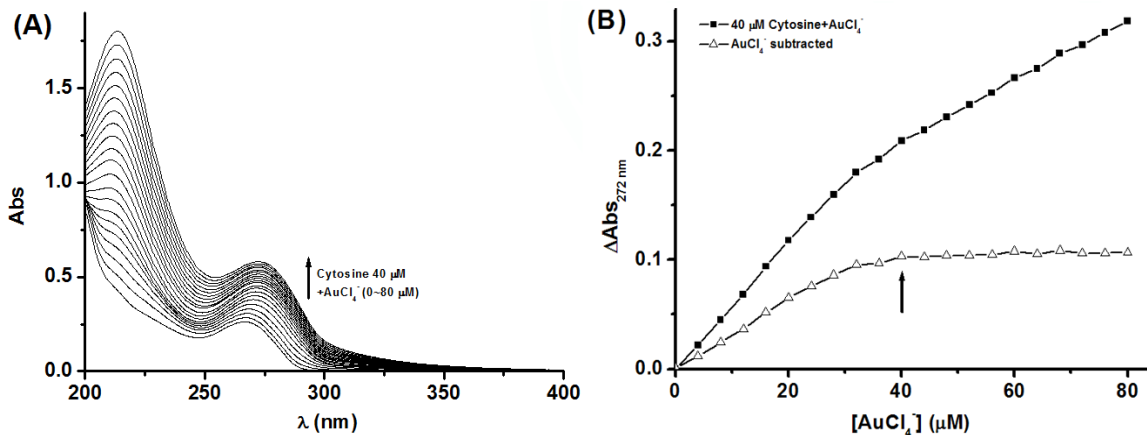

**Fig. S3.** (A) Titration of AuCl<sub>4</sub><sup>-</sup> to 40 μM cytosine monitored by UV spectra. (B) The relationship of apparent increment (solid cube) and subtracted increment (hollow triangle) in peak absorbance at 272 nm and concentration of AuCl<sub>4</sub><sup>-</sup>. The maximum ΔAbs<sub>272 nm</sub> appears at addition of 40 μM AuCl<sub>4</sub><sup>-</sup>, indicating a “saturated” complexation ratio of 1:1.

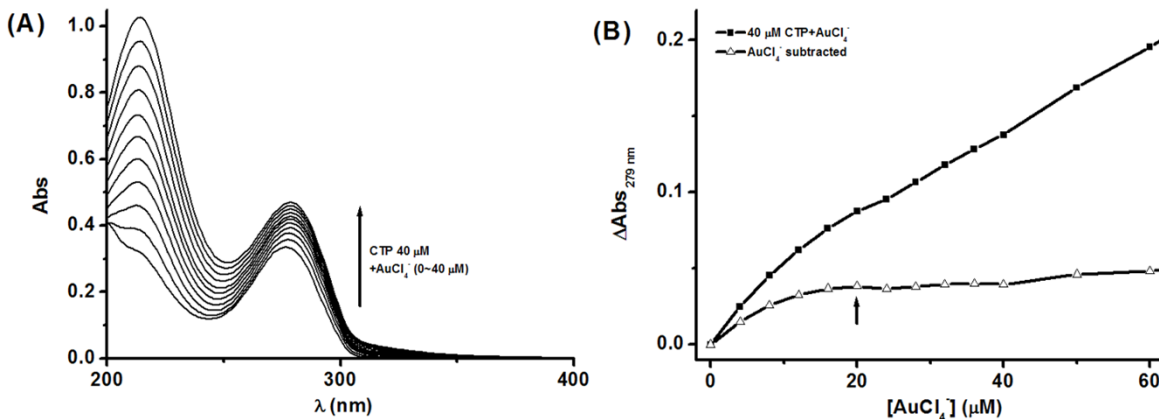

**Fig. S4.** (A) Titration of AuCl<sub>4</sub><sup>-</sup> to 40 μM CTP monitored by UV spectra. (B) The relationship of apparent increment (solid cube) and subtracted increment (hollow triangle) in peak absorbance at 279 nm and concentration of AuCl<sub>4</sub><sup>-</sup>. The maximum ΔAbs<sub>279 nm</sub> appears at addition of 20 μM AuCl<sub>4</sub><sup>-</sup>, indicating a “saturated” complexation ratio of 1:2.

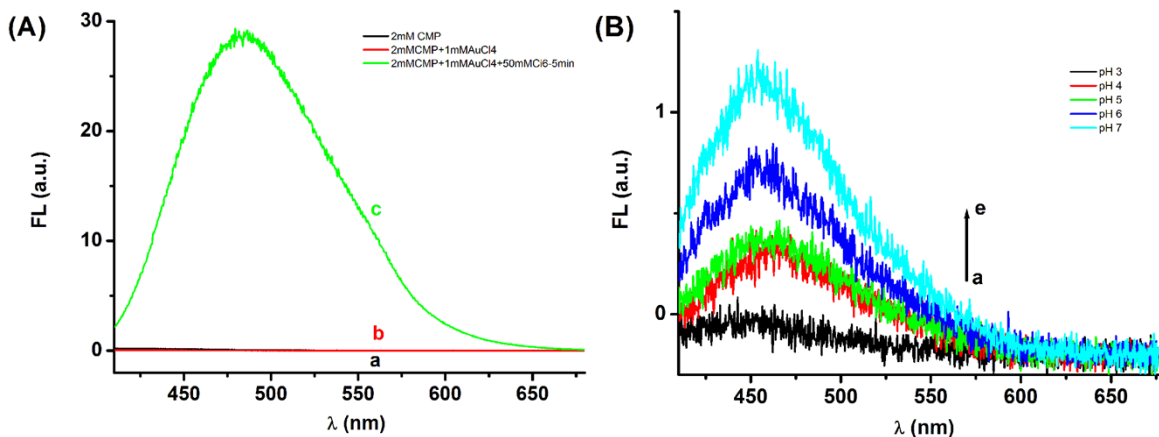

**Fig. S5.** (A) FL emission spectra for CMP (a), Au-CMP precursors before (b) and after (c) reduction by citrate at pH 6 for 5 min (excitation at 360 nm); (B) FL emission spectra of Au-CTP (molar ratio of 1:2) after reduction by citrate of pH 3~7 (a~e) for 60 min (excitation at 350 nm). Excitation/emission slit width: 3/3 nm.

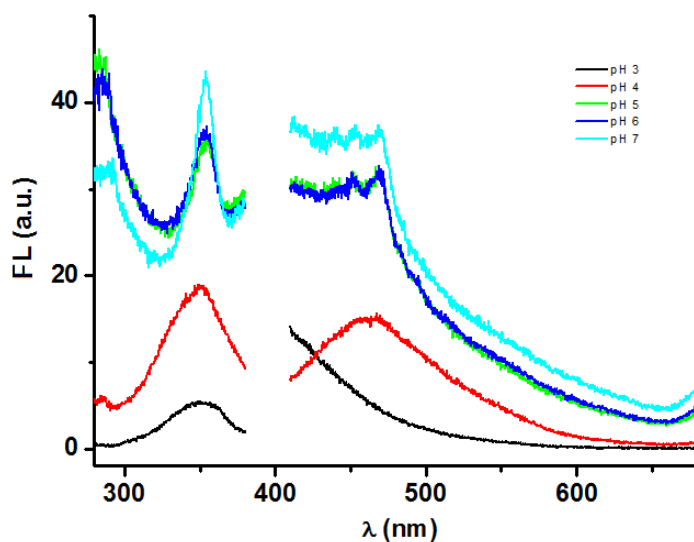

**Fig. S6.** FL emission spectra of Au-cytosine (molar ratio of Au:cytosine =1:1) at pH 3~7 after reduction for 1 h. Excitation wavelength: 360 nm. Excitation/emission slit width: 5/5 nm.

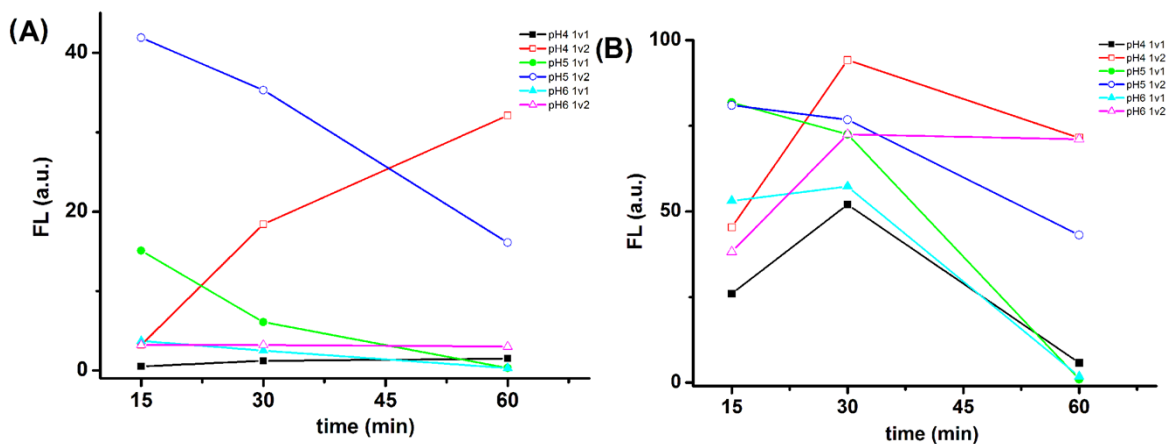

**Fig. S7.** Dependence of FL peak intensity on reduction time using Au-Cyt (A) or Au-CMP (B) precursors at a molar ratio of 1:1 (solid symbols) or 1:2 (hollow symbols) at pH 4 (square), 5 (round) and 6 (triangle), respectively. Excitation wavelength: 360 nm. Excitation/emission slit width: 3/3 nm.

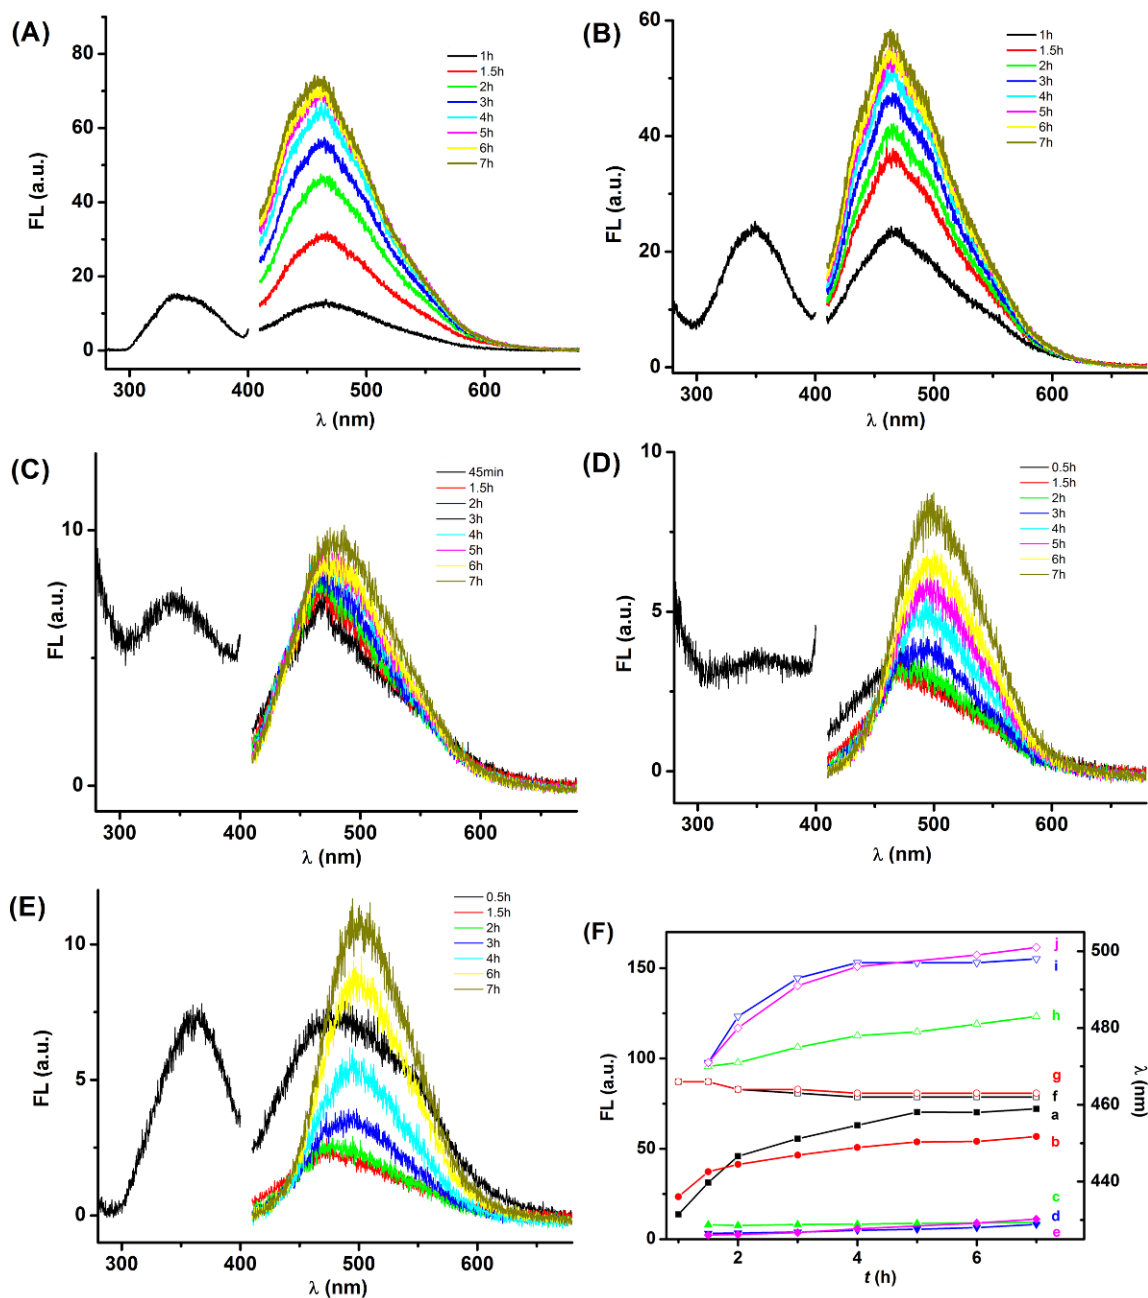

**Fig. S8.** FL emission spectra for Au-Cyt (molar ratio of Au:Cyt =1:1) by reduction of citrate at pH 3~7 (A~E) for 1~7 h. Excitation wavelength: 350 nm. Excitation/emission slit width: 5/5 nm. (F) The changes in FL peak intensity (solid, a~e) or wavelength (hollow, f~j) depend upon reduction time at pH 3 (a, f), 4 (b, g), 5 (c, h), 6 (d, i) and 7 (e, j).

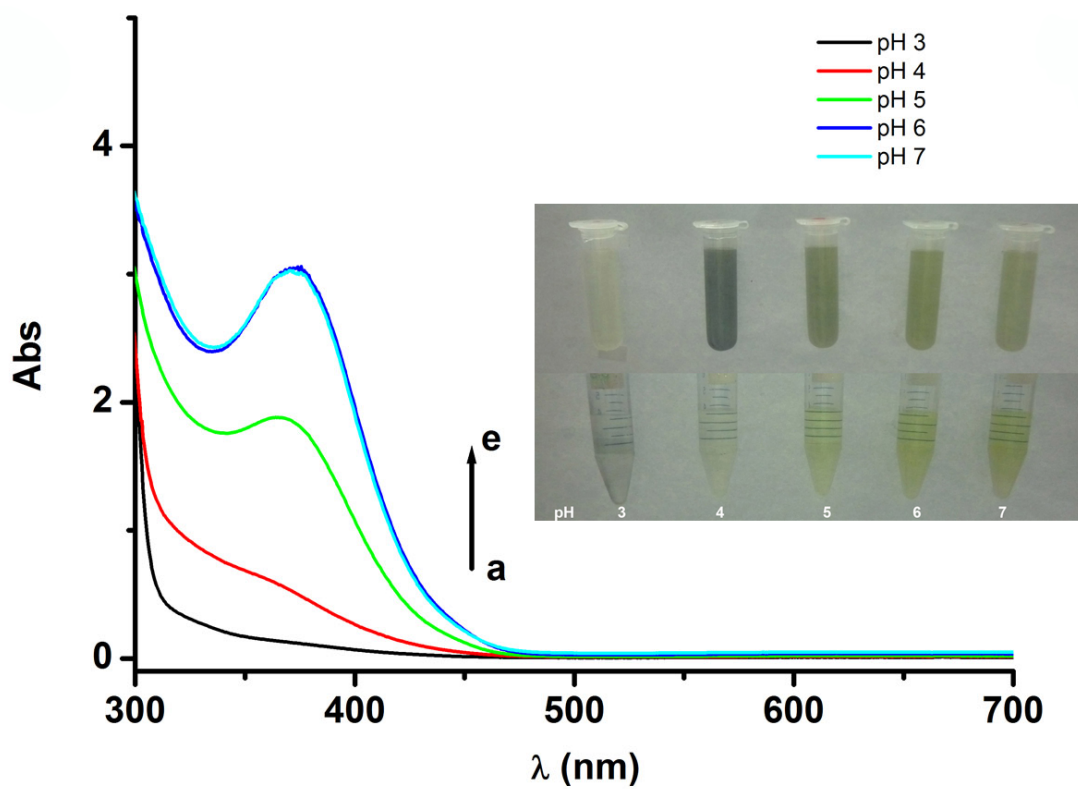

**Fig. S9.** UV-Vis absorption spectra of the mixture filtrate after reduction by citrate at pH 3~7 (a~e) for 7 h. Inset: Photos of the mixtures containing  $\text{AuCl}_4^-$  (1.0 mM), Cyt (1.0 mM) and citrate (50.0 mM) at different pH for 7-h reduction before (top) and after (down) treatment with 0.22  $\mu\text{m}$  filter. Note that the blue mixture at pH 4 before filtration is caused by the aggregated Au NPs.

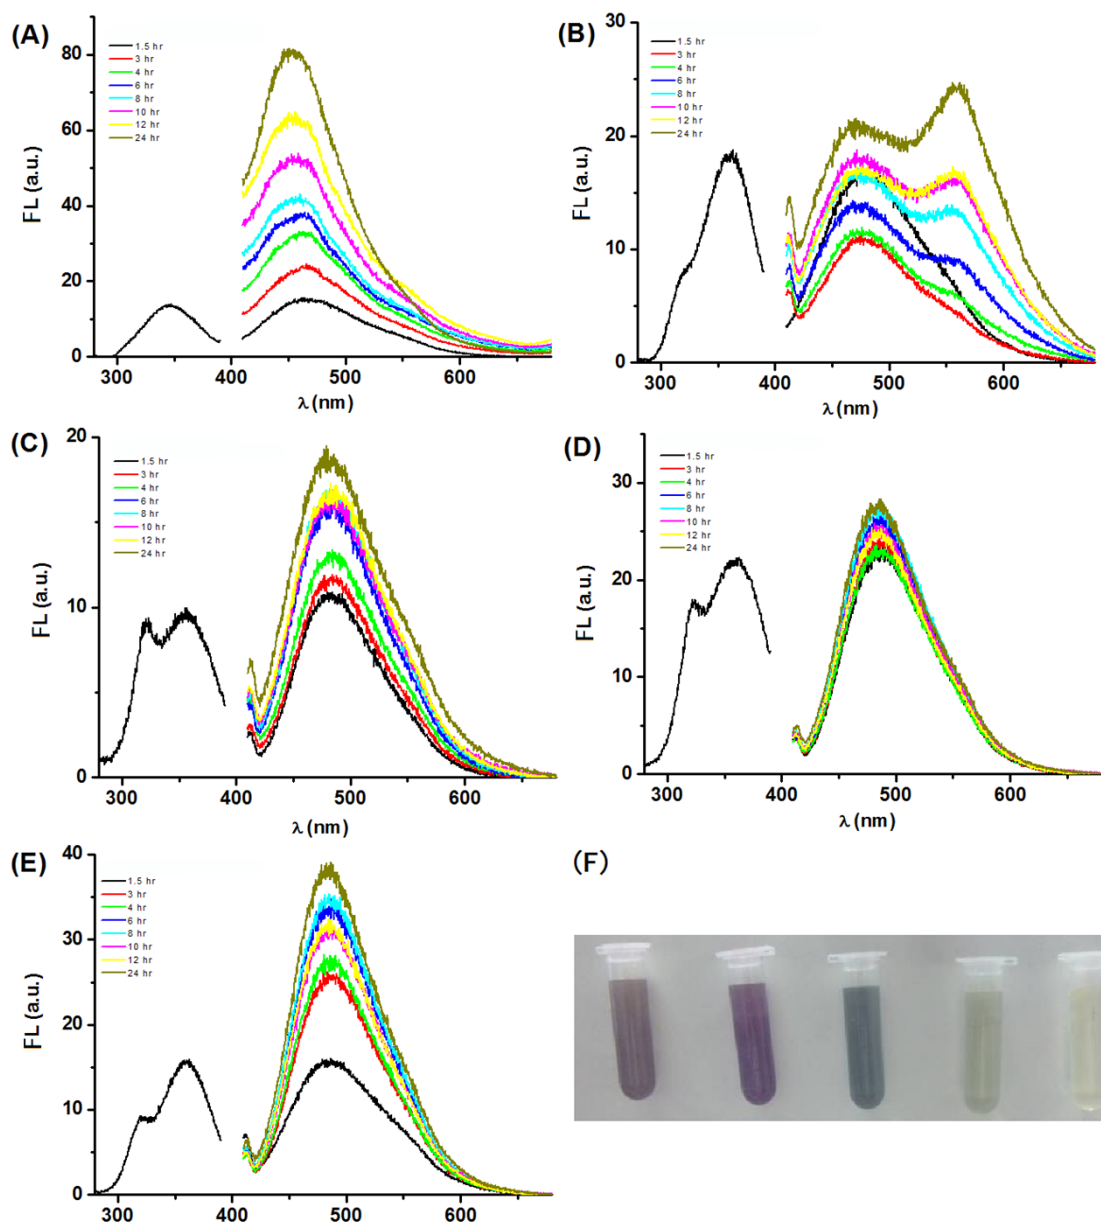

**Fig. S10.** Study on the FL dependence of Au-CMP (molar ratio of Au:CMP =1:1) on incubation time at pH 3~7 (A~E), with an excitation wavelength at 350 nm for pH 3 and 360 nm for pH 4~7. Excitation/emission slit width: 5/5 nm. (F) Photos of the mixtures containing AuCl<sub>4</sub><sup>-</sup> (1.0 mM), CMP (1.0 mM) and citrate (50.0 mM) at pH 3~7 (from left to right) after 3-h incubation.



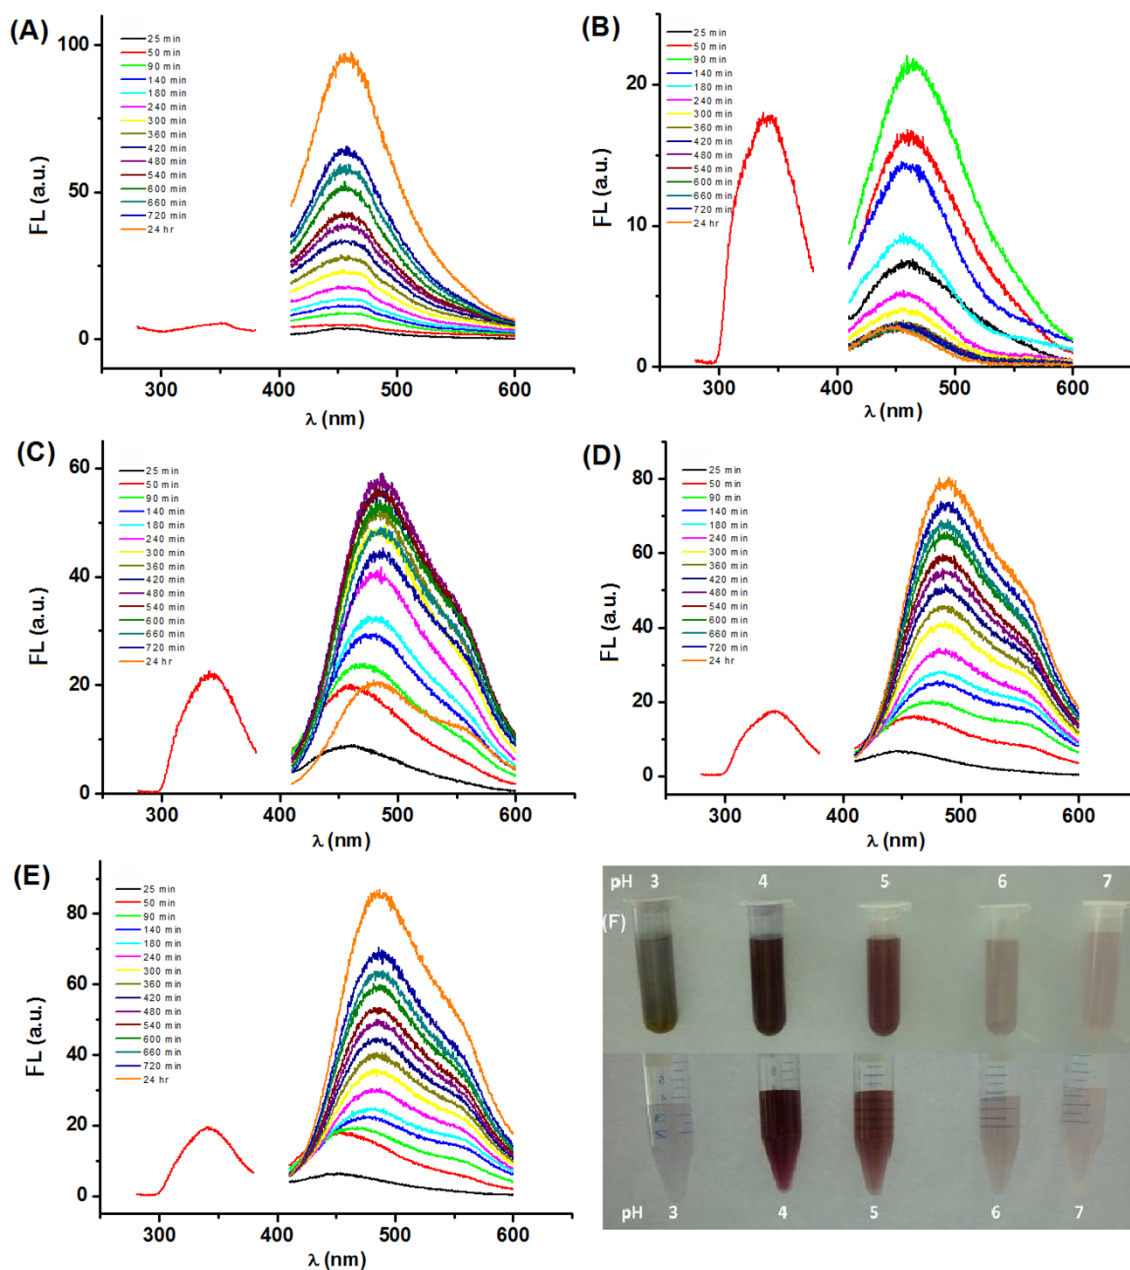

**Fig. S11.** Study on the FL dependence of Au-CTP (molar ratio of Au:CTP =1:2) on incubation time at pH 3~7 (A~E). Excitation wavelength: 350 nm. Excitation/emission slit width: 5/5 nm. (F) Photos of the mixtures containing  $\text{AuCl}_4^-$  (1.0 mM), CTP (2.0 mM) and citrate (50.0 mM) incubated at different pH for 24-h before (top) and after (down) treatment with 0.22  $\mu\text{m}$  filter.

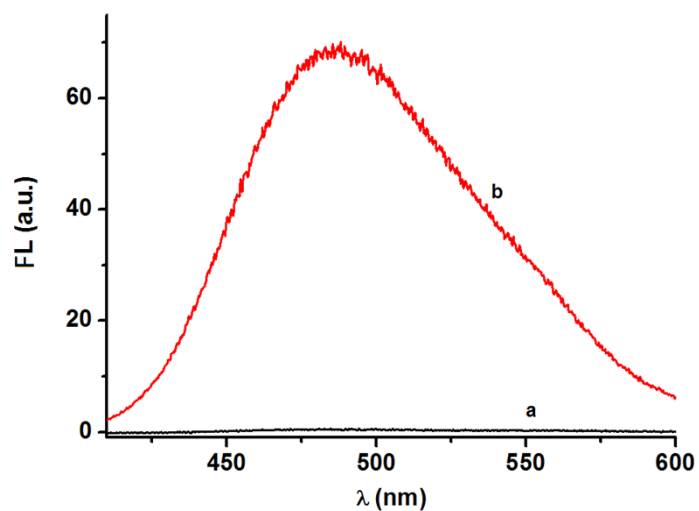

**Fig. S12.** FL emission spectra for solution in the ultrafilter (i.e.,  $MW \geq 10$  KDa) (a) and filtrate (i.e.,  $MW < 10$  KDa) (b) after ultrafiltration of the mixture containing  $\text{AuCl}_4^-$  (1.0 mM), CTP (2.0 mM) and citrate (50.0 mM, pH 7) incubated for 8-h. Excitation wavelength: 350 nm. Excitation/emission slit width: 5/5 nm. The fluorescent components are only found in the filtrate, suggesting that their MW is lower than 10 KDa.

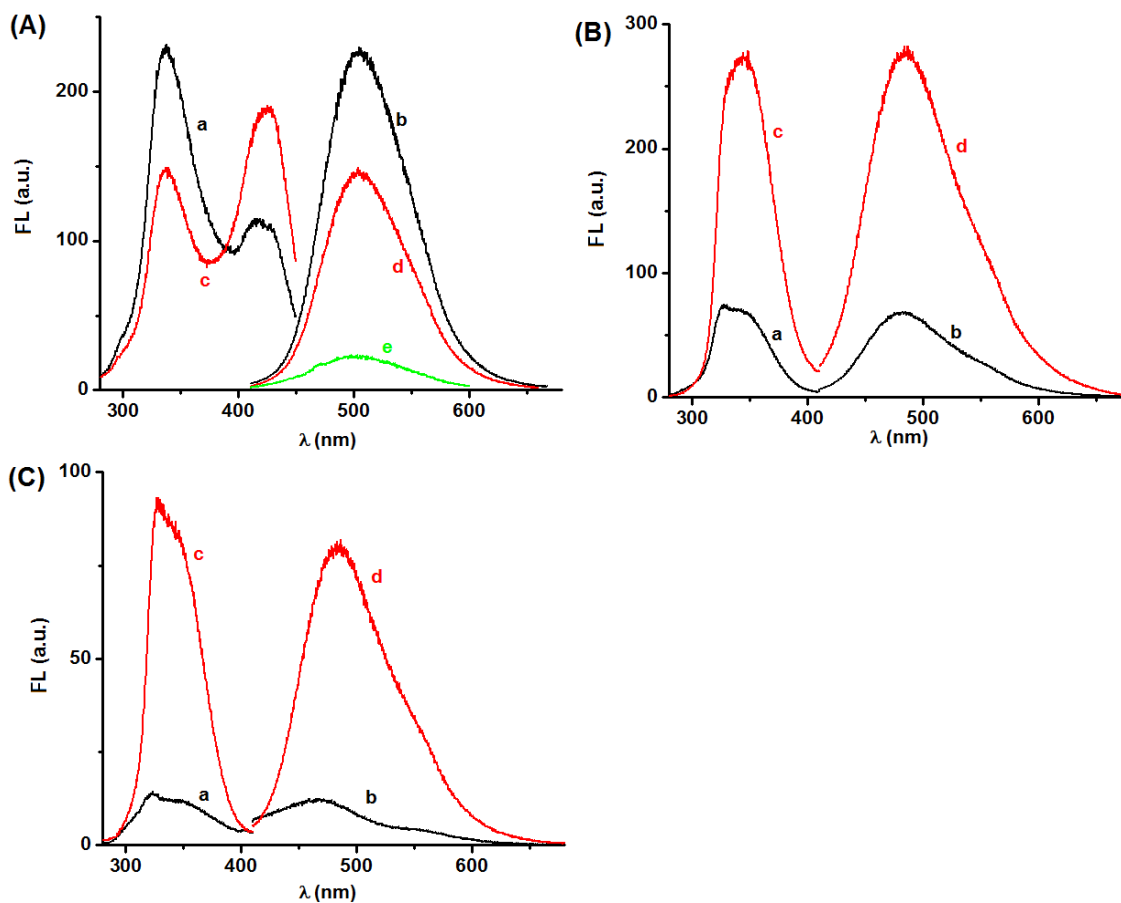

**Fig. S13.** FL excitation (a, c) and emission (b, d) spectra for Au-Cyt (A), Au-CMP (B) and Au-CTP (C) complexes at a molar ratio of 1:1 (a, b) or 1:2 (c, d) by reduction of citrate (pH 6.0) at 80 °C for 1 h. Excitation wavelength: 350 nm. Excitation/emission slit width: 5/5 nm. Curve e in part (A) shows the emission spectrum for Au-Cyt (1:1) excited at 680 nm.

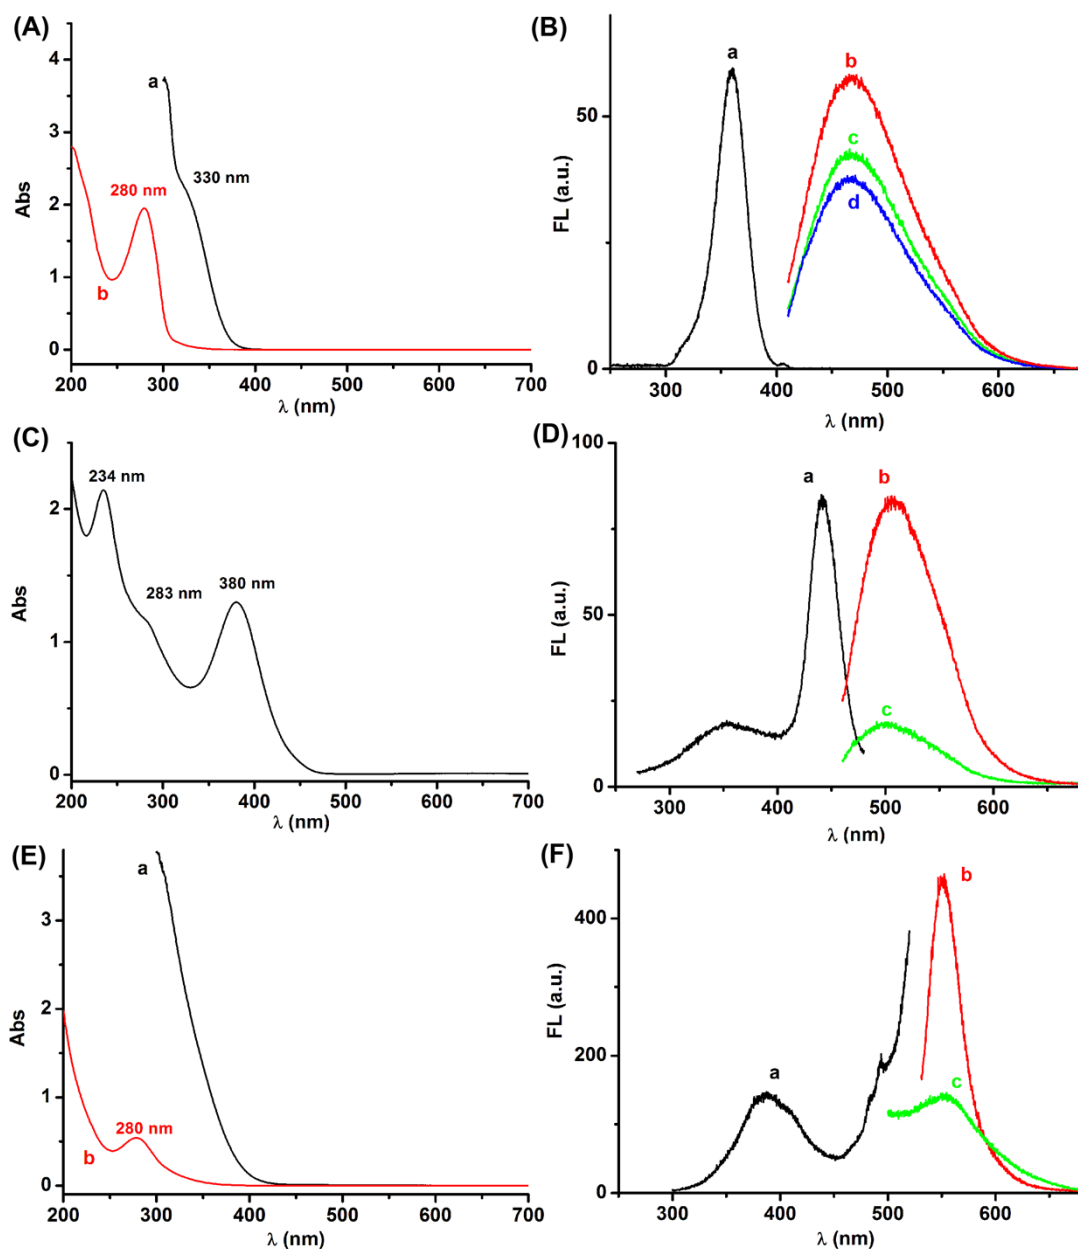

**Fig. S14.** The UV-vis spectra (A, C, E) and fluorescent spectra (B, D, F) for b-Au-CMP (A, B), g-Au-Cyt (C, D) and y-Au-CMP (E, F) in deionized water: (A, E) The UV-vis spectra for samples of  $\sim 1$  mg/mL (a) or  $\sim 0.1$  mg/mL (b); (C) UV-vis spectra for sample of  $\sim 1$  mg/mL; (B) The excitation spectra with  $\lambda_{em}$  at 470 nm (a) and emission spectra with  $\lambda_{ex}$  at 360 nm (b), 350 nm (c), 370 nm (d); (D) The excitation spectra with  $\lambda_{em}$  at 505 nm (a) and emission spectra with  $\lambda_{ex}$  at 440 nm (b), 350 nm (c); (F) The excitation spectra with  $\lambda_{em}$  at 550 nm (a) and emission spectra with  $\lambda_{ex}$  at 520 nm (b), 380 nm (c). The Excitation/emission slit width is 3/3 nm in (B) and 5/5 nm in (D) and (F),

respectively.

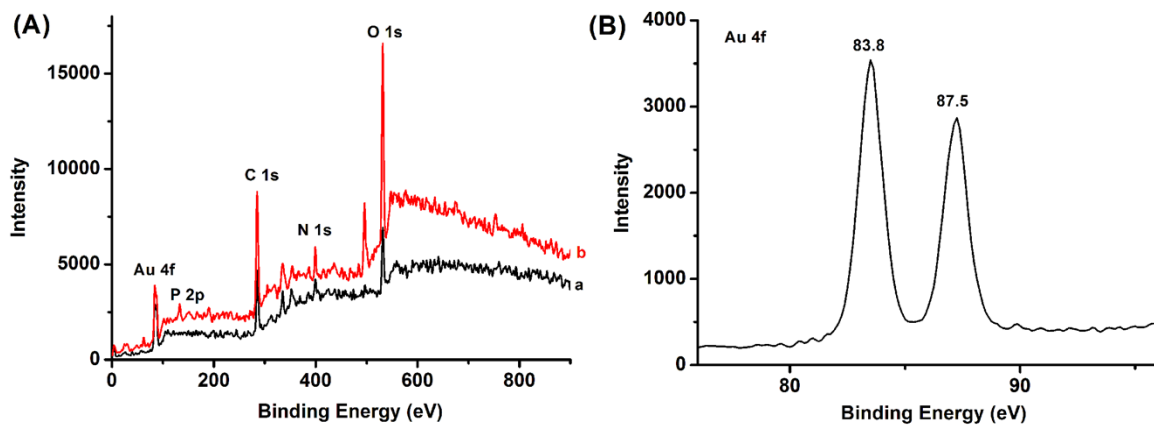

**Fig. S15.** (A) The XPS spectra for g-Au-Cyt (molar ratio of 1:1) (a) and b-Au-CMP (molar ratio of 1:2) (b). (B) The magnified Au 4f zone in (A).
